# Supplementary material
Source: publisher site journal article supplement (https://www.dovepress.com/article/495788)
Supplement: Supplementary file 1 [file get_supplementary_file.php]

**Supplement Table 1.** Baseline characteristics of participants by fibrinogen level

| Index | Normal fibrinogen group  （≤4.0 g/L） | High fibrinogen group  （>4.0 g/L) | Standardize diff | *P*-value |
| --- | --- | --- | --- | --- |
| N | 158 | 38 |  |  |
| Basic information |  |  |  |  |
| Sex (men) (%) | 107 (67.72) | 28 (73.68) | 0.13 (-0.22, 0.49) | 0.476 |
| Age (years) | 68.47±10.59 | 68.24±10.98 | 0.02 (-0.33, 0.38) | 0.902 |
| Disease duration (days) | 4.00 (3.00-6.00) | 4.00 (3.00-8.00) | 0.16 (-0.20, 0.51) | 0.960 |
| NIHSS | 3.00 (1.00-5.00) | 3.00 (1.00-7.00) | 0.20 (-0.15, 0.56) | 0.796 |
| OCSP-TACI+PACI (%) | 98 (62.03) | 20 (52.63) | 0.19 (-0.16, 0.55) | 0.288 |
| TOAST-LAA (%) | 65 (41.14) | 16 (42.11) | 0.02 (-0.33, 0.37) | 0.914 |
| Medical history |  |  |  |  |
| Ischemic stroke (%) | 60 (37.97) | 12 (31.58) | 0.13 (-0.22, 0.49) | 0.463 |
| Hypertension (%) | 112 (70.89) | 25 (65.79) | 0.11 (-0.24, 0.46) | 0.539 |
| Diabetes (%) | 56 (35.44) | 20 (52.63) | 0.35 (-0.00, 0.71) | 0.051 |
| Atrial fibrillation (%) | 23 (14.56) | 8 (21.05) | 0.17 (-0.18, 0.52) | 0.324 |
| Cardiac insufficiency (%) | 10 (6.33) | 7 (18.42) | 0.37 (0.02, 0.73) | 0.017 |
| Pneumonia (%) | 27 (17.09) | 10 (26.32) | 0.23 (-0.13, 0.58) | 0.192 |
| Laboratory findings |  |  |  |  |
| Neutrophil count (109/L) | 3.88±1.42 | 5.56±2.16 | 0.92 (0.55, 1.28) | <0.001 |
| Platelet (109/L) | 220.57±62.92 | 231.55±60.80 | 0.18 (-0.18, 0.53) | 0.332 |
| ALP (U/L) | 77.67±20.21 | 83.74±22.68 | 0.28 (-0.07, 0.64) | 0.106 |
| Direct bilirubin (μmol/l) | 4.42±1.81 | 5.34±2.95 | 0.38 (0.02, 0.73) | 0.015 |
| A/G ratio | 1.66±0.29 | 1.40±0.26 | 0.97 (0.61, 1.34) | <0.001 |
| BUN (mmol/L) | 5.04±1.54 | 6.14±1.89 | 0.64 (0.28, 1.00) | <0.001 |
| Creatinine (μmol/L) | 67.61±29.60 | 77.82±34.14 | 0.32 (-0.04, 0.68) | 0.066 |
| Uric acid (μmol/L) | 315.07±74.59 | 330.66±105.91 | 0.17 (-0.18, 0.52) | 0.291 |
| eGFR-MDRD (ml/min) | 102.34±28.56 | 95.47±45.84 | 0.18 (-0.17, 0.53) | 0.245 |
| Fasting glucose (mmol/L) | 6.10±2.05 | 6.75±2.66 | 0.27 (-0.08, 0.63) | 0.102 |
| BNP (pg/mL) | 41.50 (22.00-75.75) | 65.00 (20.75-166.25) | 0.09 (-0.27, 0.44) | 0.216 |
| LDL-C (mmol/L) | 2.73±0.86 | 2.77±1.38 | 0.03 (-0.32, 0.39) | 0.829 |
| sdLDL (mmol/L) | 0.52 (0.38-0.76) | 0.35 (0.27-0.68) | 0.19 (-0.16, 0.55) | 0.073 |
| HCY (μmol/L) | 12.40 (10.33-15.97) | 13.95 (11.25-18.33) | 0.14 (-0.21, 0.50) | 0.065 |
| Cystatin C (mg/L) | 1.14±0.25 | 1.37±0.44 | 0.66 (0.30, 1.02) | <0.001 |
| IL-6 (pg/mL) | 6.06 (4.36-8.79) | 16.26 (7.39-38.63) | 0.71 (0.35, 1.07) | <0.001 |
| Fibrinogen (g/L) | 3.01±0.57 | 4.88±0.83 | 2.62 (2.18, 3.06) | <0.001 |
| NGAL (ng/mL) | 178.22±86.15 | 254.24±131.94 | 0.68 (0.32, 1.04) | <0.001 |
| Log2 transformed NGAL (ng/mL) | 7.35±0.58 | 7.82±0.71 | 0.72 (0.36, 1.08) | <0.001 |
| NSE (ng/mL) | 13.54±4.17 | 16.54±4.88 | 0.66 (0.30, 1.02) | <0.001 |
| Medication use before admission | |  |  |  |
| Antiplatelet drugs (%) | 146 (92.41) | 34 (89.47) | 0.10 (-0.25, 0.46) | 0.553 |
| Anticoagulant drugs (%) | 26 (16.46) | 14 (36.84) | 0.47 (0.12, 0.83) | 0.005 |
| Lipid lowering drugs (%) | 155 (98.10) | 38 (100.00) | 0.20 (-0.16, 0.55) | 0.392 |
| Antidiabetic drugs (%) | 57 (36.08) | 19 (50.00) | 0.28 (-0.07, 0.64) | 0.114 |
| Antihypertensive drugs (%) | 103 (65.19) | 26 (68.42) | 0.07 (-0.29, 0.42) | 0.706 |

**Supplement Table 2.** Baseline characteristics of participants by NSE level

| Index | Normal NSE group  （<16.3 ng/mL） | High NSE group  （≥16.3 ng/mL) | Standardize diff | *P*-value |
| --- | --- | --- | --- | --- |
| N | 151 | 45 |  |  |
| Basic information |  |  |  |  |
| Sex (men) (%) | 105 (69.54) | 30 (66.67) | 0.06 (-0.27, 0.39) | 0.715 |
| Age (years) | 68.03±10.90 | 69.78±9.72 | 0.17 (-0.16, 0.50) | 0.334 |
| Disease duration (days) | 6.12±5.35 | 5.87±5.83 | 0.05 (-0.29, 0.38) | 0.223 |
| NIHSS | 3.60±3.49 | 5.36±4.60 | 0.43 (0.10, 0.77) | 0.012 |
| OCSP-TACI+PACI (%) | 94 (62.25) | 24 (53.33) | 0.18 (-0.15, 0.51) | 0.283 |
| TOAST-LAA (%) | 58 (38.41) | 23 (51.11) | 0.26 (-0.08, 0.59) | 0.129 |
| Medical history |  |  |  |  |
| Ischemic stroke (%) | 94 (62.25) | 24 (53.33) | 0.18 (-0.15, 0.51) | 0.283 |
| Hypertension (%) | 58 (38.41) | 23 (51.11) | 0.26 (-0.08, 0.59) | 0.129 |
| Diabetes (%) | 57 (37.75) | 15 (33.33) | 0.09 (-0.24, 0.43) | 0.590 |
| Atrial fibrillation (%) | 105 (69.54) | 32 (71.11) | 0.03 (-0.30, 0.37) | 0.840 |
| Cardiac insufficiency (%) | 59 (39.07) | 17 (37.78) | 0.03 (-0.31, 0.36) | 0.876 |
| Pneumonia (%) | 16 (10.60) | 15 (33.33) | 0.57 (0.23, 0.91) | <0.001 |
| Laboratory findings |  |  |  |  |
| Neutrophil count (109/L) | 3.87±1.39 | 5.35±2.18 | 0.81 (0.47, 1.15) | <0.001 |
| Platelet (109/L) | 221.24±61.81 | 227.60±65.29 | 0.10 (-0.23, 0.43) | 0.550 |
| ALP (U/L) | 77.82±20.59 | 82.29±21.32 | 0.21 (-0.12, 0.55) | 0.207 |
| Direct bilirubin (μmol/l) | 4.29±1.75 | 5.64±2.78 | 0.58 (0.24, 0.92) | <0.001 |
| A/G ratio | 1.64±0.30 | 1.53±0.30 | 0.35 (0.02, 0.69) | 0.040 |
| BUN (mmol/L) | 5.12±1.45 | 5.70±2.23 | 0.31 (-0.02, 0.65) | 0.039 |
| Creatinine (μmol/L) | 65.46±20.25 | 83.44±50.25 | 0.47 (0.13, 0.81) | 0.002 |
| Uric acid (μmol/L) | 318.92±77.68 | 315.31±94.21 | 0.04 (-0.29, 0.37) | 0.795 |
| eGFR-MDRD (ml/min) | 106.06±32.51 | 84.04±26.96 | 0.74 (0.40, 1.08) | <0.001 |
| Fasting glucose (mmol/L) | 6.16±2.10 | 6.45±2.47 | 0.13 (-0.21, 0.46) | 0.431 |
| BNP (pg/mL) | 88.46±243.95 | 203.82±296.28 | 0.43 (0.09, 0.76) | 0.002 |
| LDL-C (mmol/L) | 2.78±0.98 | 2.63±0.98 | 0.15 (-0.18, 0.49) | 0.369 |
| sdLDL (mmol/L) | 0.63±0.36 | 0.51±0.32 | 0.34 (0.00, 0.67) | 0.022 |
| HCY (μmol/L) | 13.74±7.04 | 15.98±5.56 | 0.35 (0.02, 0.69) | 0.001 |
| Cystatin C (mg/L) | 1.14±0.27 | 1.32±0.38 | 0.52 (0.18, 0.85) | <0.001 |
| IL-6 (pg/mL) | 9.29±12.89 | 30.33±49.04 | 0.59 (0.25, 0.92) | <0.001 |
| Fibrinogen (g/L) | 3.19±0.84 | 3.98±1.13 | 0.79 (0.44, 1.13) | <0.001 |
| NGAL (ng/mL) | 174.88±78.30 | 253.60±139.14 | 0.70 (0.36, 1.04) | <0.001 |
| Log2 transformed NGAL (ng/mL) | 7.33±0.56 | 7.80±0.73 | 0.71(0.37,1.05) | <0.001 |
| NSE (ng/mL) | 12.14±2.37 | 20.78±3.25 | 3.04 (2.59, 3.49) | <0.001 |
| Medication use before admission | |  |  |  |
| Antiplatelet drugs (%) | 144 (95.36) | 36 (80.00) | 0.48 (0.14, 0.82) | <0.001 |
| Anticoagulant drugs (%) | 20 (13.25) | 20 (44.44) | 0.73 (0.39, 1.07) | <0.001 |
| Lipid lowering drugs (%) | 149 (98.68) | 44 (97.78) | 0.07 (-0.26, 0.40) | 0.667 |
| Antidiabetic drugs (%) | 60 (39.74) | 16 (35.56) | 0.09 (-0.25, 0.42) | 0.614 |
| Antihypertensive drugs (%) | 100 (66.23) | 29 (64.44) | 0.04 (-0.30, 0.37) | 0.825 |

**Supplement Table 3.** Univariate analysis of NSE level associated with log2 transformed NGAL

| **Variable** | **Statistics** | **β (95% CI)** | ***p* value** |
| --- | --- | --- | --- |
| Sex (%) |  |  |  |
| Women | 61 (31.12) | ref |  |
| Men | 135 (68.88) | 0.21 (-1.14, 1.57) | 0.756 |
| Age (years) | 68.43±10.64 | 0.01 (-0.05, 0.07) | 0.654 |
| Creatinine (μmol/L) | 69.59±30.71 | 0.03 (0.01, 0.05) | <0.01 |
| Cystatin C (mmol/L) | 1.18±0.31 | 2.94 (0.96, 4.92) | <0.01 |
| eGFR-MDRD (ml/min) | 101.01±32.60 | -0.03 (-0.05, -0.01) | <0.01 |
| sdLDL (mmol/L) | 0.60±0.36 | -2.35 (-4.07, -0.62) | <0.01 |
| IL-6 (pg/mL) | 14.12±27.37 | 0.05 (0.03, 0.07) | <0.01 |
| BNP (pg/mL) | 114.94±260.67 | 0.00 (0.00, 0.01) | <0.01 |
| Log2 transformed NGAL | 7.44±0.64 | 2.64 (1.73, 3.56) | <0.01 |

**Supplement Table 4.** Sensitivity analysis on relationship of log2 transformed NGAL and fibrinogen

| **Variable** | **Model 1 (unadjusted)** | | **Model 2 (adjusted)** | |
| --- | --- | --- | --- | --- |
| **N** | **β (95% CI) *p*** | **N** | **β (95% CI) *p*** |
| All patients | 196 | 0.62 (0.42, 0.82) <0.01 | 196 | 0.37 (0.19, 0.56) <0.01 |
| Non-cardiac insufficiency | 179 | 0.61 (0.40, 0.82) <0.01 | 179 | 0.41 (0.21, 0.58) <0.01 |
| Non-pneumonia | 159 | 0.68 (0.46, 0.90) <0.01 | 159 | 0.41 (0.21, 0.61) <0.01 |
| eGFR-MDRD≥90 | 118 | 0.46 (0.19, 0.74) <0.01 | 118 | 0.31 (0.05, 0.57) <0.05 |
| Non-above three diseases | 94 | 0.49 (0.18, 0.80) <0.01 | 94 | 0.31 (0.04, 0.59) 0.027 |

Model 1: unadjusted

Model 2: adjusted for all the factors (sex, age, direct bilirubin, albumin/globulin ratio, BUN, cardiac insufficiency, and anticoagulant drugs) except the sensitivity factor itself.

**Supplement Table 5.** Hierarchical analysis on relationship of log2 transformed NGAL and NSE

| **Hierarchical factor** | | **N** | **β (95% CI) *p*** | ***p* for interaction** |
| --- | --- | --- | --- | --- |
| Sex (%) | Women | 61 | 2.81 (1.13, 6.96) 0.025 | 0.738 |
|  | Men | 135 | 3.41 (1.71, 6.82) <0.001 |
| Age (years) | <70 | 109 | 3.65 (1.73, 7.68) <0.001 | 0.523 |
|  | ≥70 | 87 | 2.54 (1.13, 5.75) 0.024 |
| Creatinine (μmol/L) | <66 | 98 | 1.37 (0.49, 3.87) 0.548 | 0.185 |
|  | ≥66 | 98 | 3.37 (1.32, 8.62) 0.011 |
| Cystatin C (mmol/L) | <1.10 | 95 | 1.43 (-0.17, 3.02) 0.081 | 0.308 |
|  | ≥1.10 | 101 | 2.48 (1.11, 3.84) <0.001 |
| eGFR-MDRD (ml/min) | <90 | 78 | 2.46 (0.96, 6.34) 0.062 | 0.575 |
|  | ≥90 | 118 | 1.73 (0.69, 4.33) 0.244 |
| sdLDL (mmol/L) | <0.49 | 97 | 1.99 (0.74, 3.24) 0.002 | 0.280 |
|  | ≥0.49 | 99 | 3.03 (1.59, 4.47) <0.001 |
| IL-6 (pg/mL) | <5.3 | 98 | 3.51 (1.19, 10.36) 0.022 | 0.518 |
|  | ≥5.3 | 98 | 2.32 (1.07, 5.05) 0.033 |
| BNP (pg/mL) | <43 | 96 | 3.13 (1.13, 8.64) 0.027 | 0.836 |
|  | ≥43 | 100 | 2.76 (1.43, 5.32) 0.002 |

Each stratification adjusted for all the factors (sex, age, creatinine, cystatin C, eGFR-MDRD, sdLDL, IL-6, and BNP) except the stratification factor itself.

**Supplement Table 6.** Univariate analysis of fibrinogen level associated with log2 transformed NGAL

| **Variable** | **Statistics** | **β (95% CI)** | ***p* value** |
| --- | --- | --- | --- |
| Sex (%) |  |  |  |
| Women | 61 (31.12) | ref |  |
| Men | 135 (68.88) | 0.29 (-0.00, 0.58) | 0.053 |
| Age (years) | 68.43±10.64 | -0.00 (-0.01, 0.01) | 0.977 |
| Direct bilirubin (μmol/l) | 4.60±2.11 | 0.06 (-0.00, 0.12) | <0.05 |
| Albumin/globulin ratio | 1.61±0.30 | -1.48 (-1.88, -1.08) | <0.01 |
| BUN (mmol/L) | 101.01±32.60 | -0.03 (-0.05, -0.01) | <0.01 |
| Cardiac insufficiency (%) | 0.60±0.36 | -2.35 (-4.07, -0.62) | <0.01 |
| No | 179 (91.33) | ref |  |
| Yes | 17 (8.67) | 0.50 (0.02, 0.98) | <0.05 |
| Anticoagulant drugs (%) |  |  |  |
| No | 156 (79.59) | ref |  |
| Yes | 40 (20.41) | 0.53 (0.20, 0.86) | <0.01 |
| Log2 transformed NGAL | 7.44±0.64 | 0.62 (0.42, 0.82) | <0.01 |

**Supplement Table 7.** Sensitivity analysis on relationship of log2 transformed NGAL and NSE

| **Sensitivity variable** | **Model 1 (unadjusted)** | | **Model 2 (adjusted)** | |
| --- | --- | --- | --- | --- |
| **N** | **β (95% CI) *p*** | **N** | **β (95% CI) *p*** |
| All patients | 196 | 2.64 (1.73, 3.56) <0.01 | 196 | 2.24 (1.15, 3.32) <0.01 |
| Non-cardiac insufficiency | 179 | 2.45 (1.50, 3.40) <0.01 | 179 | 2.08 (0.97, 3.18) <0.01 |
| Non-pneumonia | 159 | 2.76 (1.76, 3.76) <0.01 | 159 | 2.53 (1.31, 3.74) <0.01 |
| eGFR-MDRD≥90 | 118 | 2.03 (0.90, 3.15) <0.01 | 118 | 1.99 (0.73, 3.25) <0.01 |
| Non-above three diseases | 94 | 2.43 (1.13, 3.73) <0.01 | 94 | 2.36 (0.92, 3.80) <0.01 |

Model 1: unadjusted

Model 2: adjusted for all the factors (sex, age, creatinine, cystatin C, eGFR-MDRD, sdLDL, IL-6, and BNP) except the sensitivity factor itself.

**Supplement Table 8.** Hierarchical analysis on relationship of log2 transformed NGAL and fibrinogen

| **Hierarchical factor** | | **N** | **β (95% CI) *p*** | ***p* for interaction** |
| --- | --- | --- | --- | --- |
| Sex (%) | Women | 61 | 0.47 (0.13, 0.81) 0.007 | 0.334 |
|  | Men | 135 | 0.67 (0.43, 0.91) <0.001 |
| Age (years) | <70 | 109 | 0.41 (0.17, 0.65) <0.001 | 0.655 |
|  | ≥70 | 87 | 0.33 (0.05, 0.61) 0.023 |
| Direct bilirubin (μmol/l) | <4.20 | 96 | 1.34 (1.09, 1.65) 0.005 | 0.299 |
|  | ≥4.20 | 100 | 1.63 (1.19, 2.22) 0.002 |
| Albumin/globulin ratio | <1.61 | 95 | 0.54 (0.26, 0.82) <0.001 | 0.336 |
|  | ≥1.61 | 101 | 0.35 (0.08, 0.62) 0.013 |
| BUN (mmol/L) | <5.00 | 96 | 0.31 (0.05, 0.57) 0.019 | 0.208 |
|  | ≥5.00 | 100 | 0.53 (0.28, 0.78) <0.001 |
| Cardiac insufficiency (%) | No | 179 | 0.41 (0.22, 0.60) <0.001 | 0.196 |
|  | Yes | 17 | 0.01 (-0.58, 0.60) 0.966 |
| Anticoagulant drugs (%) | No | 156 | 0.35 (0.14, 0.57) <0.001 | 0.601 |
|  | Yes | 40 | 0.42 (0.07, 0.76) 0.019 |

Each stratification adjusted for all the factors (sex, age, direct bilirubin, albumin/globulin ratio, BUN, cardiac insufficiency, and anticoagulant drugs) except the stratification factor itself.

**Supplement Table 9.** Univariate analysis of NSE level associated with fibrinogen

| **Variable** | **Statistics** | **β (95% CI)** | ***p* value** |
| --- | --- | --- | --- |
| Sex (%) |  |  |  |
| Women | 61 (31.12) | ref |  |
| Men | 135 (68.88) | 0.21 (-1.14, 1.57) | 0.756 |
| Age (years) | 68.43±10.64 | 0.01 (-0.05, 0.07) | 0.654 |
| Direct bilirubin (μmol/l) | 4.60±2.11 | 0.61 (0.33, 0.90) | <0.01 |
| Creatinine (μmol/L) | 69.59±30.71 | 0.03 (0.01, 0.05) | <0.01 |
| Cystatin C (mg/L) | 1.18±0.31 | 2.94 (0.96, 4.92) | <0.01 |
| eGFR-MDRD (ml/min) | 101.01±32.60 | -0.03 (-0.05, -0.01) | <0.01 |
| sdLDL (mmol/L) | 0.60±0.36 | -2.35 (-4.07, -0.62) | <0.01 |
| Homocysteine (μmol/L) | 14.25±6.78 | 0.14 (0.05, 0.23) | <0.01 |
| IL-6 (pg/mL) | 14.12±27.37 | 0.05 (0.03, 0.07) | <0.01 |
| BNP (pg/mL) | 114.94±260.67 | 0.00 (0.00, 0.01) | <0.01 |
| Antiplatelet drugs (%) |  |  |  |
| No | 16 (8.16) | ref |  |
| Yes | 180 (91.84) | -3.57 (-5.81, -1.34) | <0.01 |
| Fibrinogen (g/L) | 3.37±0.97 | 1.52 (0.90, 2.13) | <0.01 |

**Supplement Table 10.** Sensitivity analysis on relationship of fibrinogen and NSE

| **Variable** | **Model 1 (unadjusted)** | | **Model 2 (adjusted)** | |
| --- | --- | --- | --- | --- |
| **N** | **β (95% CI) *p*** | **N** | **β (95% CI) *p*** |
| All patients | 196 | 2.64 (1.73, 3.56) <0.01 | 196 | 2.24 (1.15, 3.32) <0.01 |
| Non-cardiac insufficiency | 179 | 1.40 (0.76, 2.03) <0.01 | 179 | 1.00 (0.29, 1.71) <0.01 |
| Non-pneumonia | 159 | 2.76 (1.76, 3.76) <0.01 | 159 | 2.53 (1.31, 3.74) <0.01 |
| eGFR-MDRD≥90 | 118 | 1.23 (0.52, 1.95) <0.01 | 118 | 1.09 (0.26, 1.91) 0.011 |
| Non-above three diseases | 94 | 1.46 (0.64, 2.27) <0.01 | 94 | 1.43 (0.59, 2.27) <0.01 |

Model 1: unadjusted

Model 2: adjusted for all the factors (sex, age, direct bilirubin, creatinine, cystatin C, eGFR-MDRD, sdLDL, homocysteine, IL-6, BNP, and antiplatelet drugs) except the sensitivity factor itself.

**Supplement Table 11.** Hierarchical analysis on relationship of fibrinogen and NSE

| **Hierarchical factor** | | **N** | **β (95% CI) *p*** | ***p* for interaction** |
| --- | --- | --- | --- | --- |
| Sex (%) | Women | 61 | 1.53 (0.33, 2.74) 0.013 | 0.448 |
|  | Men | 135 | 1.02 (0.24, 1.80) 0.011 |
| Age (years) | <70 | 109 | 1.29 (0.39, 2.19) 0.005 | 0.741 |
|  | ≥70 | 87 | 1.10 (0.21, 2.00) 0.016 |
| Direct bilirubin (μmol/l) | <4.20 | 96 | 0.99 (0.08, 1.89) 0.033 | 0.132 |
|  | ≥4.20 | 100 | 1.94 (0.96, 2.92) <0.001 |
| Creatinine (μmol/L) | <66 | 98 | 1.11 (0.14, 2.09) 0.026 | 0.873 |
|  | ≥66 | 98 | 1.21 (0.31, 2.11) 0.009 |
| Cystatin C (mg/L) | <1.10 | 95 | 0.32 (-0.93, 1.57) 0.611 | 0.101 |
|  | ≥1.10 | 101 | 1.51 (0.69, 2.34) <0.001 |
| eGFR-MDRD (ml/min) | <90 | 78 | 1.42 (0.39, 2.45) 0.007 | 0.466 |
|  | ≥90 | 118 | 0.98 (0.14, 1.81) 0.022 |
| sdLDL (mmol/L) | <0.49 | 97 | 1.10 (0.22, 1.98) 0.015 | 0.832 |
|  | ≥0.49 | 99 | 1.23 (0.26, 2.19) 0.013 |
| Homocysteine (μmol/L) | <12.70 | 98 | 1.07 (0.20, 1.93) 0.016 | 0.633 |
|  | ≥12.70 | 98 | 1.36 (0.35, 2.37) 0.009 |
| IL-6 (pg/m**L**) | <5.3 | 98 | 1.41 (0.09, 2.73) 0.037 | 0.719 |
|  | ≥5.3 | 98 | 1.14 (0.32, 1.96) 0.007 |
| BNP (pg/m**L**) | <43 | 96 | 1.11 (0.04, 2.17) 0.043 | 0.899 |
|  | ≥43 | 100 | 1.19 (0.36, 2.01) 0.005 |
| Antiplatelet drugs (%) | No | 16 | 0.40 (-1.96, 2.77) 0.738 | 0.677 |
|  | Yes | 180 | 1.20 (0.51, 1.89) <0.001 |

Each stratification adjusted for all the factors (sex, age, direct bilirubin, creatinine, cystatin C, eGFR-MDRD, sdLDL, homocysteine, IL-6, BNP, and antiplatelet drugs) except the stratification factor itself.

**Supplement Table 12.** Testing the moderated mediation effects of fibrinogen on the association between log2 transformed NGAL and NSE

| **Variables** | **Model 1**  **(NSE)** | | | | | **Model 2**  **(Fibrinogen)** | | | | | **Model 3**  **(NSE)** | | | | |
| --- | --- | --- | --- | --- | --- | --- | --- | --- | --- | --- | --- | --- | --- | --- | --- |
| ***B*** | **SE**** | ***t*** | ***p*** | ***β*** | ***B*** | **SE**** | ***t*** | ***p*** | ***β*** | ***B*** | **SE**** | ***t*** | ***p*** | ***β*** |
| Constant | 3.720 | 4.848 | 0.767 | 0.444 | - | -0.067 | 1.018 | -0.066 | 0.948 | - | 3.782 | 4.769 | 0.793 | 0.429 | - |
| Gender | -0.232 | 0.692 | -0.335 | 0.738 | -0.024 | 0.246 | 0.145 | 1.692 | 0.092 | 0.118 | -0.459 | 0.686 | -0.669 | 0.504 | -0.048 |
| Age (years) | -0.027 | 0.029 | -0.916 | 0.361 | -0.063 | -0.005 | 0.006 | -0.879 | 0.381 | -0.059 | -0.022 | 0.029 | -0.756 | 0.451 | -0.052 |
| Direct bilirubin (μmol/l) | 0.379* | 0.151 | 2.515 | 0.013 | 0.178 | 0.013 | 0.032 | 0.398 | 0.691 | 0.027 | 0.367* | 0.148 | 2.477 | 0.014 | 0.173 |
| Creatinine (μmol/L) | 0.001 | 0.016 | 0.034 | 0.973 | 0.004 | -0.001 | 0.003 | -0.443 | 0.658 | -0.047 | 0.002 | 0.016 | 0.121 | 0.904 | 0.013 |
| Cystatin C (mg/L) | -1.727 | 1.349 | -1.280 | 0.202 | -0.120 | 0.811** | 0.283 | 2.864 | 0.005 | 0.260 | -2.477 | 1.357 | -1.825 | 0.070 | -0.172 |
| eGFR-MDRD (ml/min) | -0.022 | 0.014 | -1.587 | 0.114 | -0.159 | 0.002 | 0.003 | 0.570 | 0.569 | 0.055 | -0.023 | 0.013 | -1.724 | 0.086 | -0.170 |
| sdLDL (mmol/L) | -0.716 | 0.867 | -0.826 | 0.410 | -0.057 | 0.095 | 0.182 | 0.524 | 0.601 | 0.035 | -0.804 | 0.853 | -0.943 | 0.347 | -0.064 |
| Hemocyanin (μmol/L) | 0.042 | 0.047 | 0.891 | 0.374 | 0.064 | -0.009 | 0.010 | -0.879 | 0.381 | -0.061 | 0.050 | 0.046 | 1.077 | 0.283 | 0.076 |
| IL-6 (pg/mL) | 0.017 | 0.012 | 1.448 | 0.149 | 0.105 | 0.011** | 0.002 | 4.538 | 0.000 | 0.318 | 0.007 | 0.012 | 0.547 | 0.585 | 0.041 |
| BNP (pg/mL) | 0.001 | 0.001 | 0.623 | 0.534 | 0.049 | -0.000 | 0.000 | -0.395 | 0.693 | -0.030 | 0.001 | 0.001 | 0.711 | 0.478 | 0.055 |
| Antiplatelet drugs (%) | -1.683 | 1.101 | -1.529 | 0.128 | -0.103 | 0.019 | 0.231 | 0.083 | 0.934 | 0.005 | -1.701 | 1.083 | -1.571 | 0.118 | -0.105 |
| Log2 transformed NGAL | **2.136**** | 0.548 | 3.899 | 0.000 | 0.304 | **0.331**** | 0.115 | 2.875 | 0.005 | 0.217 | **1.830**** | 0.551 | 3.323 | 0.001 | 0.261 |
| Fibrinogen (g/L) |  |  |  |  |  |  |  |  |  |  | **0.924**** | 0.346 | 2.668 | 0.008 | 0.201 |
| *R* 2 | 0.263 | | | | | 0.312 | | | | | 0.291 | | | | |
| Adjusted *R* 2 | 0.215 | | | | | 0.266 | | | | | 0.241 | | | | |
| *F* value** | *F* (12,183) =5.454, *p*<0.001 | | | | | *F* (12,183) =6.901, *p*<0.001 | | | | | *F* (13,182) =5.750, *p*<0.001 | | | | |

* *p*<0.05 ** *p*<0.01

Model 1: Constructing a regression model with independent variable X (log2 transformed NGAL) and Y (NSE).

Model 2: Construct a regression model with independent variable X (log2 transformed NGAL) and intermediate variable M (fibrinogen).

Model 3: Construct a regression model with independent variable X (log2 transformed NGAL) and intermediate variable M (fibrinogen) together with dependent variable Y (NSE).

**Supplement Table 13.** Chain mediating role of fibrinogen in relationship between log2 transformed NGAL and NSE.

| **Variables** | **Symbol** | **Effect** | **Effect values** | **95% CI** | | ***z* /*t value*** | ***p* value** | **Conclusion** |
| --- | --- | --- | --- | --- | --- | --- | --- | --- |
| **low** | **up** |
| Log2 transformed NGAL and Fibrinogen → NSE | a*b | Indirect (mediated) effect | 0.305 | 0.004 | 0.087 | 14.318 | <0.001 | Partial mediation |
| Log2 transformed NGAL → Fibrinogen | a | X → M | 0.331 | 0.105 | 0.556 | 2.875 | 0.005 |
| Fibrinogen → NSE | b | M → Y | 0.924 | 0.245 | 1.603 | 2.668 | 0.008 |
| Log2 transformed NGAL → NSE | c' | Direct effects | 1.830 | 0.751 | 2.909 | 3.323 | 0.001 |
| Log2 transformed NGAL → NSE | c | Total effects | 2.135 | 1.062 | 3.209 | 3.899 | <0.001 |

Note: X: Independent variable (log2 transformed NGAL); M: Mediator variable (fibrinogen); Y: Dependent variable (NSE).
